# Supplementary material
Source: PubMed Central journal article supplement (PMC8135255)
Supplement: NIHMS1700820-supplement-Supplemental_Tables_S1_and_S2.pdf [file NIHMS1700820-supplement-Supplemental_Tables_S1_and_S2.pdf]

Table S1

*Sample Demographic Characteristics for Children Providing Useable ERP Data*

|                                 | Preterm ( <i>n</i> = 43) | Full-Term ( <i>n</i> = 49) | <i>p</i> |
|---------------------------------|--------------------------|----------------------------|----------|
|                                 | <i>n</i> (%)             | <i>n</i> (%)               |          |
| Child's Sex - # male            | 19 (44.2)                | 24 (50.0)                  | .64      |
| Child's Ethnicity - # White     | 42 (97.6)                | 45 (91.8)                  | .22      |
| Maternal Education              |                          |                            | .56      |
| High school degree or GED       | 2 (4.7)                  | 3 (6.1)                    |          |
| Associate degree                | 3 (7.0)                  | 7 (14.3)                   |          |
| Bachelor's degree               | 19 (44.2)                | 23 (46.9)                  |          |
| Graduate or professional degree | 19 (44.2)                | 16 (32.6)                  |          |
| Maternal Work                   |                          |                            | .01*     |
| Full-time work for pay          | 20 (46.5)                | 15 (30.6)                  |          |
| Part-time work for pay          | 6 (14.0)                 | 20 (40.8)                  |          |
| Student                         | 2 (4.7)                  | 0 (0)                      |          |
| Stay at home parent             | 15 (34.9)                | 14 (28.6)                  |          |
| Annual Household Income         |                          |                            | .31      |
| ≤ \$50,000                      | 5 (11.9)                 | 4 (8.3)                    |          |
| \$51,000 - \$100,000            | 17 (40.5)                | 23 (47.9)                  |          |
| \$101,000 - \$150,000           | 7 (16.7)                 | 13 (27.1)                  |          |
| ≥ \$151,000                     | 13 (31.0)                | 8 (16.3)                   |          |
| Marital Status - # married      | 40 (93.0)                | 48 (98.0)                  | .39      |

Notes. Two families within this subsample declined to provide household income. *p* represents the p-value corresponding to the independent samples t-test or Chi square test. \**p* < .05

Table S2

*Sample Perinatal Characteristics for Children Providing Useable ERP Data*

|                                          | Preterm ( <i>n</i> = 43)<br><i>M</i> ( <i>SD</i> ) | Full-Term ( <i>n</i> = 49)<br><i>M</i> ( <i>SD</i> ) | <i>p</i> |
|------------------------------------------|----------------------------------------------------|------------------------------------------------------|----------|
| <b>Birth History</b>                     |                                                    |                                                      |          |
| Gestational age (weeks)                  | 35.18 (1.40)                                       | 39.74 (1.02)                                         | < .01*   |
| Birth weight (grams)                     | 2599.28 (466.37)                                   | 3717.15 (519.38)                                     | < .01*   |
| Apgar at 1 minute                        | 7.83 (1.63)                                        | 8.13 (1.16)                                          | .32      |
| Apgar at 5 minutes                       | 8.71 (.84)                                         | 8.91 (.36)                                           | .15      |
| Length of hospital stay (days)           | 9.47 (9.96)                                        | 2.06 (.76)                                           | < .01*   |
| Maternal age at delivery (years)         | 31.53 (4.61)                                       | 32.63 (4.74)                                         | .27      |
|                                          | <i>n</i> (%)                                       | <i>n</i> (%)                                         | <i>p</i> |
| <b>Pregnancy Related Characteristics</b> |                                                    |                                                      |          |
| Twin gestation <sup>a</sup>              | 8 (11.6)                                           | 0 (0)                                                | < .01*   |
| Cesarean delivery                        | 22 (51.1)                                          | 12 (25.0)                                            | < .01*   |
| Preeclampsia or hypertension             | 8 (18.6)                                           | 2 (4.2)                                              | < .03*   |
| Diabetes mellitus                        | 4 (27.9)                                           | 4 (8.3)                                              | .87      |
| <b>Neonatal Complications</b>            |                                                    |                                                      |          |
| Glucose treatment                        | 14 (32.6)                                          | 1 (2.1)                                              | < .01*   |
| Phototherapy                             | 13 (30.2)                                          | 2 (4.2)                                              | < .01*   |
| Respiratory distress                     | 12 (28.0)                                          | 1 (2.1)                                              | < .01*   |
| Positive pressure ventilation            | 6 (14.0)                                           | 1 (2.1)                                              | .05*     |
| Apnea                                    | 7 (16.3)                                           | 0 (0)                                                | < .01*   |
| Hypovolemia                              | 2 (4.7)                                            | 0 (0)                                                | .22      |

Notes. One full-term parent within this subsample declined to provide access to medical records. *p* represents the *p*-value corresponding to the independent samples *t*-test or Chi square test.

<sup>a</sup>Only one twin per pair was tested. \**p* < .05
