# Supplementary material
Source: PubMed Central journal article supplement (PMC8135255)
Supplement: NIHMS1700820-supplement-Supplemental_Tables_S3_and_S4.pdf [file NIHMS1700820-supplement-Supplemental_Tables_S3_and_S4.pdf]

Table S3

*ERP latencies (in ms) to peak by trial type and group*

|           | Preterm ( <i>n</i> = 43) |           |                    |           | Full-Term ( <i>n</i> = 49) |           |                    |           |
|-----------|--------------------------|-----------|--------------------|-----------|----------------------------|-----------|--------------------|-----------|
|           | Congruent trials         |           | Incongruent trials |           | Congruent trials           |           | Incongruent trials |           |
|           | <i>M</i>                 | <i>SD</i> | <i>M</i>           | <i>SD</i> | <i>M</i>                   | <i>SD</i> | <i>M</i>           | <i>SD</i> |
| N1 at Fz  | 163.91                   | 35.02     | 181.02             | 46.18     | 163.35                     | 41.38     | 184.65             | 49.85     |
| P2 at Fz  | 251.63                   | 33.25     | 232.93             | 35.28     | 244.57                     | 39.20     | 241.47             | 37.71     |
| N2 at Fz  | 508.56                   | 61.60     | 486.79             | 67.58     | 513.80                     | 69.43     | 498.53             | 69.29     |
| N2 at Cz  | 437.67                   | 51.15     | 429.67             | 47.45     | 434.53                     | 56.16     | 436.65             | 45.41     |
| P3 at Cz  | 788.37                   | 104.41    | 811.35             | 105.47    | 801.31                     | 90.43     | 814.86             | 98.17     |
| P3a at Pz | 362.23                   | 38.09     | 349.40             | 36.87     | 348.41                     | 33.29     | 352.16             | 36.60     |
| P3b at Pz | 524.65                   | 59.18     | 505.12             | 65.86     | 534.20                     | 51.00     | 515.84             | 66.54     |

Table S4

*ERP peak amplitudes (in microvolts) by trial type and group*

|           | Preterm ( <i>n</i> = 43) |           |                    |           | Full-Term ( <i>n</i> = 49) |           |                    |           |
|-----------|--------------------------|-----------|--------------------|-----------|----------------------------|-----------|--------------------|-----------|
|           | Congruent trials         |           | Incongruent trials |           | Congruent trials           |           | Incongruent trials |           |
|           | <i>M</i>                 | <i>SD</i> | <i>M</i>           | <i>SD</i> | <i>M</i>                   | <i>SD</i> | <i>M</i>           | <i>SD</i> |
| N1 at Fz  | -3.63                    | 5.03      | -6.28              | 5.43      | -3.48                      | 4.38      | -4.84              | 4.66      |
| P2 at Fz  | 4.20                     | 6.25      | -0.62              | 5.76      | 5.00                       | 6.34      | 2.11               | 5.18      |
| N2 at Fz  | -7.62                    | 7.07      | -13.17             | 8.37      | -7.39                      | 7.45      | -11.21             | 6.64      |
| N2 at Cz  | -2.87                    | 5.16      | -5.52              | 6.89      | -3.72                      | 5.44      | -6.83              | 5.86      |
| P3 at Cz  | 8.87                     | 6.15      | 8.69               | 5.00      | 9.43                       | 5.97      | 9.10               | 6.25      |
| P3a at Pz | 11.66                    | 5.72      | 13.00              | 7.03      | 11.90                      | 5.78      | 14.08              | 6.55      |
| P3b at Pz | 14.09                    | 6.52      | 15.02              | 7.64      | 13.76                      | 6.61      | 15.77              | 6.29      |
